# Supplementary material
Source: PubMed Central journal article supplement (PMC3382938)
Supplement: supp_blood-2011-09-380410_blood-2011-09-380410-1.pdf [file supp_blood-2011-09-380410_blood-2011-09-380410-1.pdf]

**A**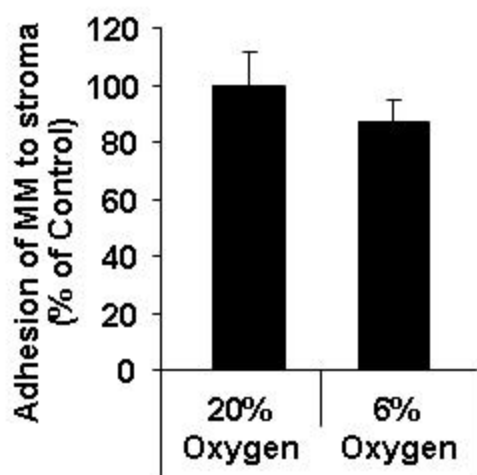**B**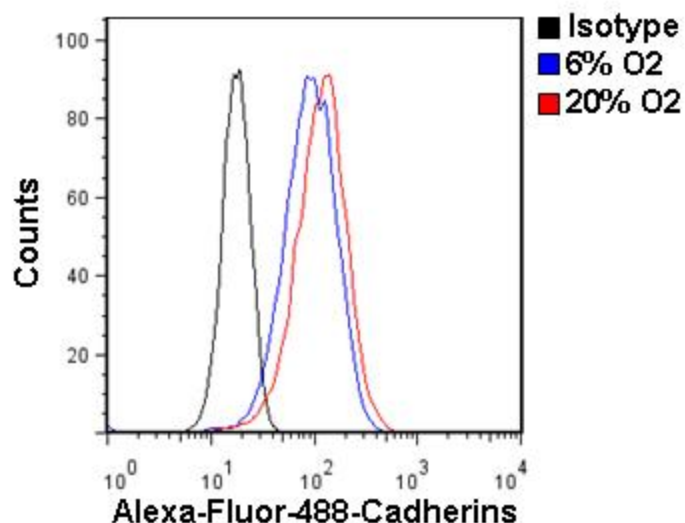**C**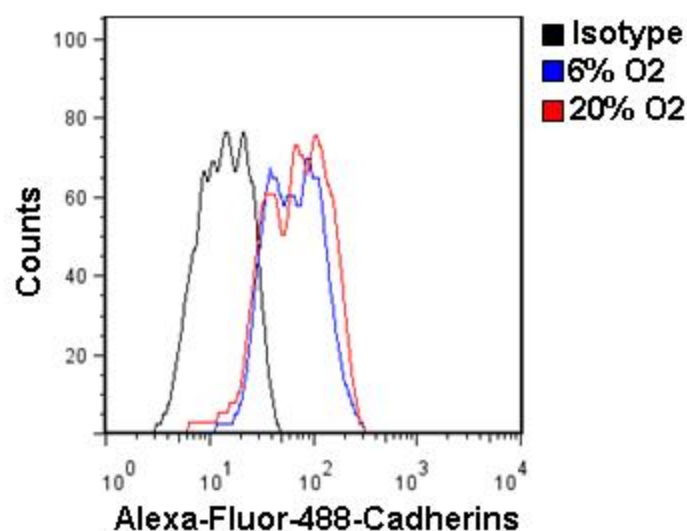**D**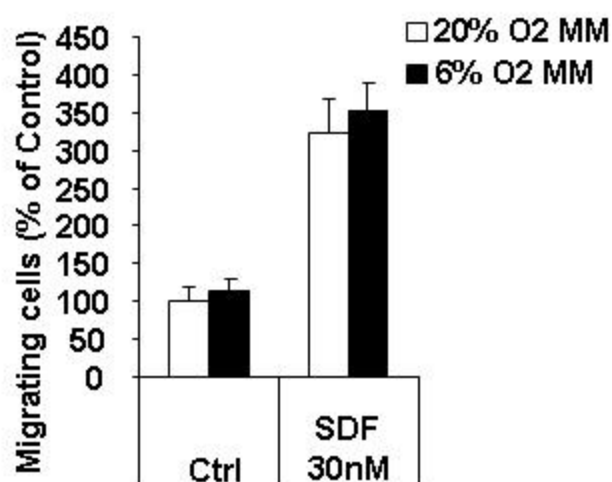**E**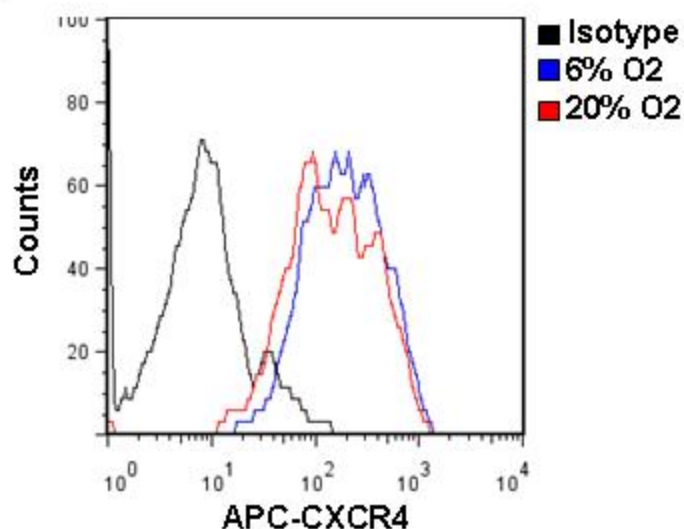**Supplementary Figure 1:**

The effect of 6% O<sub>2</sub> on the adhesion of MM cells to stroma (A), expression of E-cadherin in MM cells (B) and in stromal cells (C), and on migration of MM cells to SDF1 (D), and on expression of CXCR4 in MM cells (E).
